# Supplementary material for: Prospective association between adherence to the Mediterranean diet and hepatic steatosis: the Swiss CoLaus cohort study
Source: HighWire-hosted journal article supplement (doi:10.1136/bmjopen-2020-040959), 2020-12-01
Supplement: bmjopen-2020-040959supp001_data_supplement.pdf [file bmjopen-2020-040959supp001_data_supplement.pdf]

**Supplementary file**

**Title:** The association between adherence to the Mediterranean diet and hepatic steatosis: the Swiss CoLaus prospective cohort study

## Table of Content

|                                                                                                                                                                                                                                                                                                        |    |
|--------------------------------------------------------------------------------------------------------------------------------------------------------------------------------------------------------------------------------------------------------------------------------------------------------|----|
| <b>Figure S1</b> Sample selection flow chart. ....                                                                                                                                                                                                                                                     | 3  |
| <b>Table S1</b> Characteristics of the participants included and excluded from the analysis, CoLaus study, Switzerland. ....                                                                                                                                                                           | 4  |
| <b>Table S2</b> Baseline characteristics of the participants according to the risk of hepatic steatosis defined by the fatty liver index or the NAFLD-score, CoLaus study, Switzerland. ....                                                                                                           | 5  |
| <b>Table S3</b> Prospective association of the Mediterranean diet score with the risk of hepatic steatosis, CoLaus study, Switzerland: assessment of influence of other potential covariates. ....                                                                                                     | 6  |
| <b>Table S4</b> Sensitivity analyses for the associations of the Mediterranean diet score with the risk of hepatic steatosis, CoLaus study, Switzerland. ....                                                                                                                                          | 8  |
| <b>Table S5</b> Prospective association of the Mediterranean diet score with the risk of hepatic steatosis, CoLaus study, Switzerland: sensitivity analysis while excluding participants with only one of the indices high at baseline and using hepatic steatosis index as an alternative score. .... | 11 |
| <b>Table S6</b> Prospective association of the Mediterranean diet score with the risk of hepatic steatosis, CoLaus study, Switzerland (n=1632), Sensitivity analysis while excluding participants with either indices high (using FLI>30 instead of FLI≥60). ....                                      | 13 |
| <b>Table S7</b> Association of the Mediterranean diet score with change in BMI and waist circumference, CoLaus study, Switzerland. ....                                                                                                                                                                | 14 |
| <b>Table S8</b> Association of the Mediterranean diet score with the GGT, ALT, and AST, CoLaus study, Switzerland. ....                                                                                                                                                                                | 15 |

**Figure S1** Sample selection flow chart.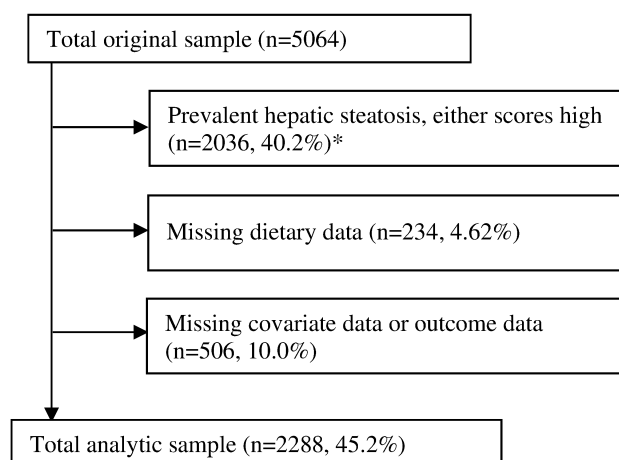

\* Prevalent hepatic steatosis was defined as having either fatty liver index  $\geq 60$  OR non-alcoholic fatty liver disease fatty liver score  $\geq -0.640$ .

**Table S1** Characteristics of the participants included and excluded from the analysis, CoLaus study, Switzerland.

| Characteristic                | Included<br>(n=2288) | Excluded<br>(n=2776) | P-value* |
|-------------------------------|----------------------|----------------------|----------|
| Age, years                    | 55.8±10.0            | 59.4±10.6            | <0.001   |
| Women (%)                     | 65.4                 | 43.6                 | <0.001   |
| Marital status (%)†           |                      |                      | 0.038    |
| Single                        | 16.5                 | 14.0                 |          |
| Married/cohabiting            | 56.6                 | 57.4                 |          |
| Widowed/separated/divorced    | 26.8                 | 28.6                 |          |
| Employed (%)                  | 63.5                 | 50.4                 | <0.001   |
| Education (%)†                |                      |                      | <0.001   |
| University                    | 25.9                 | 17.5                 |          |
| High school                   | 28.5                 | 23.6                 |          |
| Apprenticeship                | 33.2                 | 37.4                 |          |
| Mandatory education           | 12.5                 | 21.4                 |          |
| Current smoker (%)            | 20.1                 | 23.1                 | <0.001   |
| Alcohol consumption (%)‡      |                      |                      | <0.001   |
| Abstainers                    | 23.5                 | 26.8                 |          |
| Moderate                      | 69.3                 | 63.3                 |          |
| Heavy                         | 7.2                  | 9.9                  |          |
| Total energy intake (kcal/d)  | 1807±673             | 1853±784             | 0.033    |
| Total protein (% energy)      | 15.4±3.3             | 15.6±3.5             | 0.015    |
| Total carbohydrate (% energy) | 47.0±8.6             | 45.4±9.1             | <0.001   |
| Total fat (% energy)          | 34.3±6.7             | 34.4±6.9             | 0.54     |
| TEE (kcal/d)                  | 2575±586             | 2790±669             | <0.001   |
| Metabolic syndrome (%)§       | 10.8                 | 60.9                 | <0.001   |
| BMI (kg/m <sup>2</sup> )      | 23.7±2.8             | 28.3±4.8             | <0.001   |
| Waist circumference (cm)      | 84.4±8.9             | 98.3±12.5            | <0.001   |
| Triglycerides (mmol/l)        | 1.0±0.5              | 1.6±1.1              | <0.001   |
| median (iqr)                  | 0.9 (0.7, 1.2)       | 1.4 (1.0, 2.0)       |          |
| GGT (U/l)                     | 23.8±16.0            | 48.8±60.8            | <0.001   |
| median (iqr)                  | 19 (14, 27)          | 32 (21, 53)          |          |
| ≥50 (%)                       | 5.6                  | 27.5                 | <0.001   |
| ALT (U/l)                     | 21.8±8.8             | 32.5±20.7            | <0.001   |
| median (iqr)                  | 20 (16, 25)          | 27 (20, 38)          |          |
| ≥40 (%)                       | 5.0                  | 23.3                 | <0.001   |
| AST (U/l)                     | 25.9±6.2             | 31.6±14.1            | <0.001   |
| median (iqr)                  | 25 (22, 29)          | 28 (24, 34)          |          |
| ≥37 (%)                       | 5.6                  | 20.4                 | <0.001   |

Abbreviations: TEE, total energy expenditure; BMI, body mass index; iqr, interquartile range; GGT, gamma-glutamyl transferase; ALT, alanine aminotransferase; AST, aspartate aminotransferase.

Data are mean ± SD for continuous variables or percent for categorical variables, unless otherwise stated.

\* P-value calculated using Chi-square test for categorical variables and student's t-test for continuous variables.

† Due to some missing data, percentages do not always add to 100%.

‡ Alcohol consumption categorized as “abstainers” (0 unit/week), “moderate” (1–21 units/week for men, 1–14 for women), and “heavy drinkers” (>21 units/week for men, >14 for women).

§ Metabolic syndrome defined according to the International Diabetic Federation (waist circumference ≥94 cm in men and ≥80 cm in women plus at least two of the following factors: serum triglycerides ≥1.70 mmol/L or specific treatment for this lipid abnormality; serum high-density lipoprotein cholesterol <1.03 mmol/L in men and <1.29 mmol/L in women or specific treatment for this lipid abnormality; systolic blood pressure ≥130 mmHg or diastolic blood pressure ≥85 mmHg or treatment for previously diagnosed hypertension; and fasting plasma glucose ≥5.6 mmol/L or previously diagnosed type 2 diabetes).

**Table S2** Baseline characteristics of the participants according to the risk of hepatic steatosis defined by the fatty liver index or the NAFLD-score, CoLaus study, Switzerland.

| Characteristic               | Risk of hepatic steatosis |                |          |                |                |          |
|------------------------------|---------------------------|----------------|----------|----------------|----------------|----------|
|                              | FLI                       |                | P-value* | NAFLD-score    |                | P-value* |
|                              | No<br>(n=2135)            | Yes<br>(n=153) |          | No<br>(n=2080) | Yes<br>(n=208) |          |
| Age, years                   | 55.8±10.1                 | 54.9±9.5       | 0.29     | 55.6±10        | 57.7±10.1      | 0.003    |
| Women (%)                    | 66.8                      | 45.8           | <0.001   | 66.7           | 52.9           | <0.001   |
| Marital status (%)†          |                           |                | 0.86     |                |                | 0.79     |
| Single                       | 16.6                      | 15.0           |          | 16.7           | 14.9           |          |
| Married/cohabiting           | 56.5                      | 58.2           |          | 56.5           | 58.2           |          |
| Widowed/Separated/divorced   | 26.8                      | 26.8           |          | 26.8           | 26.9           |          |
| Employed (%)                 | 63.3                      | 66.0           | 0.50     | 64.5           | 53.8           | 0.002    |
| Education (%)†               |                           |                | 0.013    |                |                | 0.33     |
| University                   | 26.7                      | 15.0           |          | 26.4           | 20.7           |          |
| High school                  | 28.3                      | 30.1           |          | 28.3           | 29.8           |          |
| Apprenticeship               | 32.6                      | 40.5           |          | 32.8           | 36.5           |          |
| Mandatory education          | 12.3                      | 14.4           |          | 12.4           | 13.0           |          |
| Current smoker (%)           | 19.7                      | 25.5           | 0.006    | 20.3           | 17.8           | 0.52     |
| Alcohol consumption (%)‡     |                           |                | 0.15     |                |                | 0.001    |
| Abstainers                   | 23.3                      | 26.1           |          | 22.5           | 33.7           |          |
| Moderate                     | 69.7                      | 63.4           |          | 70.4           | 58.7           |          |
| Heavy                        | 6.9                       | 10.5           |          | 7.1            | 7.7            |          |
| Total energy intake (kcal/d) | 1800±655                  | 1906±879       | 0.062    | 1794±654       | 1938±833       | 0.003    |
| Protein (% energy)           | 15.3±3.1                  | 16.1±5.0       | 0.006    | 15.3±3.2       | 16.0±4.1       | 0.006    |
| Carbohydrate (% energy)      | 47.1±8.5                  | 45.6±10.1      | 0.037    | 47.0±8.5       | 46.5±9.5       | 0.36     |
| Fat (% energy)               | 34.3±6.7                  | 33.8±7.2       | 0.37     | 34.2±6.7       | 34.4±6.6       | 0.69     |
| TEE (kcal/d)                 | 2552±572                  | 2912±677       | <0.001   | 2562±582       | 2699±616       | 0.002    |
| Metabolic syndrome (%)§      | 9.9                       | 22.9           | <0.001   | 9.8            | 21.2           | <0.001   |
| BMI (kg/m <sup>2</sup> )     | 23.5±2.7                  | 26.8±2.6       | <0.001   | 23.5±2.8       | 26.0±2.5       | <0.001   |
| Waist circumference (cm)     | 83.8±8.7                  | 93.4±7.0       | <0.001   | 83.7±8.7       | 92.0±7.4       | <0.001   |
| Triglycerides (mmol/l)       | 1.0±0.5                   | 1.2±0.5        | <0.001   | 1.0±0.5        | 1.2±0.5        | <0.001   |
| median (iqr)                 | 0.9 (0.7, 1.2)            | 1.1 (0.7, 1.2) |          | 0.9 (0.7, 1.2) | 1.1 (0.8, 1.4) |          |
| GGT (U/l)                    | 23.1±15.2                 | 32.4±22.2      | <0.001   | 23.3±15.4      | 28.1±20.6      | <0.001   |
| median (iqr)                 | 19 (14, 26)               | 26 (18, 40)    |          | 19 (14, 26)    | 22 (15, 34)    |          |
| ≥50 (%)                      | 4.9                       | 15.0           | <0.001   | 5.3            | 9.1            | 0.022    |
| ALT (U/l)                    | 21.6±8.8                  | 23.5±8.9       | 0.013    | 21.3±8.4       | 26.0±11.6      | <0.001   |
| median (iqr)                 | 19 (16, 25)               | 21 (17, 28)    |          | 19 (16, 25)    | 23 (18, 30)    |          |
| ≥40 (%)                      | 5.0                       | 5.9            | 0.63     | 4.5            | 10.6           | <0.001   |
| AST (U/l)                    | 25.9±6.2                  | 26.3±6.3       | 0.50     | 25.9±6.2       | 26.9±6.2       | 0.026    |
| median (iqr)                 | 25 (22, 29)               | 25 (22, 29)    |          | 25 (22, 29)    | 26 (22, 30)    |          |
| ≥37 (%)                      | 5.5                       | 7.2            | 0.39     | 5.3            | 8.2            | 0.096    |

Abbreviations: TEE, total energy expenditure; FLI, fatty liver index; NAFLD, non-alcoholic fatty liver disease; BMI, body mass index; iqr, interquartile range; GGT, gamma-glutamyl transferase; ALT, alanine aminotransferase; AST, aspartate Aminotransferase.

Data are mean ± SD for continuous variables or percent for categorical variables, unless otherwise stated.

\* P-value calculated using Chi-square test for categorical variables and student's t-test for continuous variables.

† Due to some missing data, percentages do not always add to 100%.

‡ Alcohol consumption categorized as “abstainers” (0 unit/week), “moderate” (1–21 units/week for men, 1–14 for women), and “heavy drinkers” (>21 units/week for men, >14 for women).

§ Metabolic syndrome defined according to the International Diabetic Federation (waist circumference ≥94 cm in men and ≥80 cm in women plus at least two of the following factors: serum triglycerides ≥1.70 mmol/L or specific treatment for this lipid abnormality; serum high-density lipoprotein cholesterol <1.03 mmol/L in men and <1.29 mmol/L in women or specific treatment for this lipid abnormality; systolic blood pressure ≥130 mm Hg or diastolic blood pressure ≥85 mm Hg or treatment for previously diagnosed hypertension; and fasting plasma glucose ≥5.6 mmol/L or previously diagnosed type 2 diabetes).

**Table S3** Prospective association of the Mediterranean diet score with the risk of hepatic steatosis, CoLaus study, Switzerland: assessment of influence of other potential covariates.

|                                      | Risk ratio (95% CI) across quintiles of Mediterranean diet score* |                   |                   |                   |                   | P-trend | Risk ratio (95% CI) Per SD increase* |
|--------------------------------------|-------------------------------------------------------------------|-------------------|-------------------|-------------------|-------------------|---------|--------------------------------------|
|                                      | Q1                                                                | Q2                | Q3                | Q4                | Q5                |         |                                      |
| <i>Range</i>                         | 1.83-7.63                                                         | 7.64-8.35         | 8.36-8.92         | 8.93-9.59         | 9.60-12.1         |         |                                      |
| N total                              | 458                                                               | 458               | 457               | 458               | 457               |         |                                      |
| Fatty liver index†                   |                                                                   |                   |                   |                   |                   |         |                                      |
| Different models                     |                                                                   |                   |                   |                   |                   |         |                                      |
| N Cases (score≥60)                   | 36                                                                | 43                | 35                | 22                | 17                |         |                                      |
| Multivariable (Model 1)‡             | 1.00 (ref.)                                                       | 1.11 (0.72, 1.72) | 1.07 (0.68, 1.66) | 0.71 (0.42, 1.22) | 0.50 (0.28, 0.91) | 0.006   | 0.84 (0.71, 0.99)                    |
| Model 1 + Changes in BMI categories§ | 1.00 (ref.)                                                       | 1.11 (0.73, 1.69) | 0.98 (0.64, 1.50) | 0.73 (0.43, 1.24) | 0.59 (0.32, 1.06) | 0.024   | 0.85 (0.72, 1.02)                    |
| Model 1 + Alcohol                    | 1.00 (ref.)                                                       | 1.11 (0.72, 1.72) | 1.06 (0.69, 1.65) | 0.71 (0.41, 1.22) | 0.50 (0.28, 0.91) | 0.006   | 0.84 (0.70, 0.99)                    |
| Model 1 + Alcohol+ BMI               | 1.00 (ref.)                                                       | 1.13 (0.74, 1.73) | 0.92 (0.59, 1.42) | 0.76 (0.45, 1.29) | 0.63 (0.35, 1.14) | 0.047   | 0.86 (0.72, 1.04)                    |
| Model 1 + Clinical variables**       | 1.00 (ref.)                                                       | 1.30 (0.80, 2.11) | 1.20 (0.74, 1.94) | 0.77 (0.43, 1.39) | 0.57 (0.30, 1.09) | 0.023   | 0.84 (0.70, 1.01)                    |
| Model 1 + Clinical variables + BMI   | 1.00 (ref.)                                                       | 1.28 (0.79, 2.07) | 0.94 (0.58, 1.52) | 0.80 (0.45, 1.41) | 0.68 (0.36, 1.27) | 0.076   | 0.86 (0.71, 1.04)                    |
| Model 1 + MetS††                     | 1.00 (ref.)                                                       | 1.14 (0.74, 1.75) | 1.03 (0.66, 1.60) | 0.68 (0.40, 1.16) | 0.51 (0.28, 0.93) | 0.005   | 0.83 (0.70, 0.99)                    |
| NAFLD-score‡‡                        |                                                                   |                   |                   |                   |                   |         |                                      |
| Different models                     |                                                                   |                   |                   |                   |                   |         |                                      |
| N Cases (score≥-0.640)               | 41                                                                | 46                | 51                | 38                | 32                |         |                                      |
| Multivariable (Model 1)‡             | 1.00 (ref.)                                                       | 1.13 (0.75, 1.70) | 1.26 (0.85, 1.87) | 1.01 (0.65, 1.56) | 0.80 (0.50, 1.28) | 0.28    | 0.95 (0.82, 1.10)                    |
| Model 1 + Changes in BMI categories§ | 1.00 (ref.)                                                       | 1.13 (0.76, 1.69) | 1.18 (0.80, 1.74) | 1.04 (0.68, 1.60) | 0.93 (0.58, 1.48) | 0.65    | 0.99 (0.86, 1.16)                    |
| Model 1 + Alcohol                    | 1.00 (ref.)                                                       | 1.11 (0.73, 1.67) | 1.22 (0.82, 1.82) | 0.97 (0.63, 1.51) | 0.77 (0.48, 1.23) | 0.21    | 0.94 (0.81, 1.09)                    |
| Model 1 + Alcohol+ BMI               | 1.00 (ref.)                                                       | 1.16 (0.78, 1.73) | 1.15 (0.78, 1.68) | 1.04 (0.68, 1.61) | 0.93 (0.58, 1.48) | 0.62    | 0.99 (0.85, 1.15)                    |
| Model 1 + Clinical variables**       | 1.00 (ref.)                                                       | 1.20 (0.78, 1.84) | 1.32 (0.88, 1.98) | 0.99 (0.64, 1.55) | 0.85 (0.52, 1.37) | 0.33    | 0.95 (0.82, 1.11)                    |
| Model 1 + Clinical variables + BMI   | 1.00 (ref.)                                                       | 1.21 (0.80, 1.84) | 1.19 (0.80, 1.78) | 1.06 (0.69, 1.64) | 0.99 (0.61, 1.60) | 0.76    | 0.99 (0.85, 1.16)                    |

Abbreviations: SES, socio-economic status; BMI, body mass index; MetS, metabolic syndrome; NAFLD, non-alcoholic fatty liver disease; SD, standard deviation; CI, confidence interval.

Statistical analysis using Poisson regression with robust standard errors; results are expressed as risk ratios and (95% confidence intervals).

\* In categorical analysis, the population was divided into five groups by quintiles (Q1-Q5) of the Mediterranean diet score; Standard deviation was 1.20 for different multivariable analyses.

† Calculated based on an algorithm including BMI, waist circumference, triglycerides, and gamma-glutamyl transferase.

‡ Adjusted for age (years), sex, marital status (single, married/cohabitant, and widowed/Separated/divorced), occupational status (working and not working), education level (university, high school, apprenticeship, and mandatory education), smoking status (never, former, and current), energy intake (kcal/day), total energy expenditure (kcal/day), and date of dietary assessment.

§ Changes in BMI categories defined as individuals with a normal BMI at baseline and follow-up, individuals with normal BMI at baseline and overweight or obese BMI at follow-up, individuals with overweight or obese BMI at baseline and at follow-up, or individuals with overweight or obese BMI at baseline and normal at follow-up.

|| Results of further adjustment for waist circumference were broadly in line with of the further adjustment for BMI (data not shown).

\*\*Family history of diabetes (yes/no), high blood pressure (yes/no), high triglyceride level (yes/no), low HDL level (yes/no), and high glucose level (yes/no).

†† Metabolic syndrome as defined by the International Diabetes Federation (yes/no).

‡‡ Calculated based on an algorithm including presence of the metabolic syndrome and type 2 diabetes, and concentrations of fasting serum insulin, fasting serum aspartate-aminotransferase (AST), and the AST/alanine-aminotransferase ratio.

**Table S4** Sensitivity analyses for the associations of the Mediterranean diet score with the risk of hepatic steatosis, CoLaus study, Switzerland.

|                                                                     | Risk ratio (95% CI) across quintiles of Mediterranean diet score* |                   |                   |                   |                   | <i>P</i> -trend | Risk ratio<br>(95% CI)<br>Per SD increase* |
|---------------------------------------------------------------------|-------------------------------------------------------------------|-------------------|-------------------|-------------------|-------------------|-----------------|--------------------------------------------|
|                                                                     | Q1                                                                | Q2                | Q3                | Q4                | Q5                |                 |                                            |
| <i>Range</i>                                                        | 1.83-7.63                                                         | 7.64-8.35         | 8.36-8.92         | 8.93-9.59         | 9.60-12.1         |                 |                                            |
| N total                                                             | 458                                                               | 458               | 457               | 458               | 457               |                 |                                            |
| Fatty liver index†                                                  |                                                                   |                   |                   |                   |                   |                 |                                            |
| Different models                                                    |                                                                   |                   |                   |                   |                   |                 |                                            |
| N Cases (score≥60)                                                  | 36                                                                | 43                | 35                | 22                | 17                |                 |                                            |
| Multivariable (Model 1)‡                                            | 1.00 (ref.)                                                       | 1.11 (0.72, 1.72) | 1.07 (0.68, 1.66) | 0.71 (0.42, 1.22) | 0.50 (0.28, 0.91) | 0.006           | 0.84 (0.71, 0.99)                          |
| Excluding alcohol from MDS component                                |                                                                   |                   |                   |                   |                   |                 |                                            |
| Model 1 + Alcohol                                                   | 1.00 (ref.)                                                       | 1.64 (1.04, 2.58) | 1.08 (0.65, 1.80) | 1.17 (0.70, 1.96) | 0.65 (0.35, 1.18) | 0.069           | 0.86 (0.73, 1.03)                          |
| Model 1 + Alcohol + BMI§                                            | 1.00 (ref.)                                                       | 1.53 (0.98, 2.39) | 0.94 (0.57, 1.54) | 1.08 (0.67, 1.77) | 0.75 (0.41, 1.35) | 0.15            | 0.89 (0.75, 1.06)                          |
| Excluding participants with BMI≥30                                  |                                                                   |                   |                   |                   |                   |                 |                                            |
| N Cases (score≥60)                                                  | 35                                                                | 40                | 28                | 19                | 16                |                 |                                            |
| Model 1                                                             | 1.00 (ref.)                                                       | 1.08 (0.69, 1.68) | 0.90 (0.56, 1.46) | 0.64 (0.36, 1.12) | 0.50 (0.27, 0.93) | 0.005           | 0.83 (0.69, 0.98)                          |
| Model 1 + BMI§                                                      | 1.00 (ref.)                                                       | 1.02 (0.66, 1.58) | 0.84 (0.53, 1.33) | 0.65 (0.37, 1.14) | 0.60 (0.33, 1.10) | 0.031           | 0.85 (0.70, 1.02)                          |
| Excluding participants with excessive alcohol consumption**         |                                                                   |                   |                   |                   |                   |                 |                                            |
| N Cases (score≥60)                                                  | 33                                                                | 42                | 34                | 21                | 17                |                 |                                            |
| Model 1                                                             | 1.00 (ref.)                                                       | 1.17 (0.75, 1.84) | 1.12 (0.71, 1.77) | 0.70 (0.40, 1.23) | 0.52 (0.28, 0.95) | 0.007           | 0.82 (0.69, 0.98)                          |
| Model 1 + BMI§                                                      | 1.00 (ref.)                                                       | 1.17 (0.76, 1.81) | 0.91 (0.58, 1.42) | 0.73 (0.42, 1.24) | 0.64 (0.35, 1.15) | 0.037           | 0.85 (0.71, 1.02)                          |
| Excluding participants with implausible energy intake††             |                                                                   |                   |                   |                   |                   |                 |                                            |
| N Cases (score≥60)                                                  | 33                                                                | 41                | 33                | 22                | 16                |                 |                                            |
| Model 1                                                             | 1.00 (ref.)                                                       | 1.19 (0.63, 2.23) | 1.16 (0.61, 2.20) | 0.87 (0.45, 1.69) | 0.69 (0.35, 1.38) | 0.16            | 0.85 (0.71, 1.01)                          |
| Model 1 + BMI§                                                      | 1.00 (ref.)                                                       | 1.13 (0.60, 2.13) | 0.90 (0.47, 1.73) | 0.81 (0.43, 1.53) | 0.74 (0.37, 1.49) | 0.20            | 0.86 (0.72, 1.04)                          |
| Excluding participants with secondary causes of hepatic steatosis‡‡ |                                                                   |                   |                   |                   |                   |                 |                                            |
| N Cases (score≥60)                                                  | 37                                                                | 42                | 35                | 22                | 17                |                 |                                            |
| Model 1                                                             | 1.00 (ref.)                                                       | 1.18 (0.75, 1.85) | 1.11 (0.70, 1.76) | 0.78 (0.45, 1.34) | 0.51 (0.27, 0.94) | 0.010           | 0.85 (0.71, 1.01)                          |
| Model 1 + BMI§                                                      | 1.00 (ref.)                                                       | 1.17 (0.75, 1.83) | 0.95 (0.60, 1.50) | 0.78 (0.46, 1.31) | 0.63 (0.34, 1.17) | 0.050           | 0.86 (0.72, 1.04)                          |
| Excluding participants with diabetes§§                              |                                                                   |                   |                   |                   |                   |                 |                                            |
| N Cases (score≥60)                                                  | 35                                                                | 40                | 35                | 22                | 16                |                 |                                            |
| Model 1                                                             | 1.00 (ref.)                                                       | 1.06 (0.67, 1.66) | 1.11 (0.71, 1.73) | 0.74 (0.43, 1.27) | 0.49 (0.26, 0.91) | 0.009           | 0.84 (0.71, 0.998)                         |
| Model 1 + BMI§                                                      | 1.00 (ref.)                                                       | 1.06 (0.69, 1.65) | 0.92 (0.59, 1.43) | 0.76 (0.45, 1.29) | 0.58 (0.32, 1.06) | 0.033           | 0.85 (0.71, 1.02)                          |
| NAFLD-score ¶¶                                                      |                                                                   |                   |                   |                   |                   |                 |                                            |
| Different models                                                    |                                                                   |                   |                   |                   |                   |                 |                                            |
| N Cases (score≥-0.640)                                              | 41                                                                | 46                | 51                | 38                | 32                |                 |                                            |
| Multivariable (Model 1)‡                                            | 1.00 (ref.)                                                       | 1.13 (0.75, 1.70) | 1.26 (0.85, 1.87) | 1.01 (0.65, 1.56) | 0.80 (0.50, 1.28) | 0.28            | 0.95 (0.82, 1.10)                          |



|                                                                     |             |                   |                   |                   |                   |      |                   |
|---------------------------------------------------------------------|-------------|-------------------|-------------------|-------------------|-------------------|------|-------------------|
| Excluding alcohol from MD component                                 |             |                   |                   |                   |                   |      |                   |
| Model 1 + Alcohol                                                   | 1.00 (ref.) | 1.15 (0.78, 1.71) | 0.92 (0.61, 1.41) | 0.92 (0.59, 1.42) | 0.89 (0.57, 1.38) | 0.34 | 0.93 (0.81, 1.08) |
| Model 1 + Alcohol + BMI§                                            | 1.00 (ref.) | 1.15 (0.78, 1.69) | 0.88 (0.59, 1.32) | 0.88 (0.57, 1.35) | 1.02 (0.66, 1.57) | 0.65 | 0.96 (0.83, 1.12) |
| Excluding participants with BMI≥30                                  |             |                   |                   |                   |                   |      |                   |
| N Cases (score≥-0.640)                                              | 40          | 46                | 44                | 36                | 31                |      |                   |
| Model 1                                                             | 1.00 (ref.) | 1.15 (0.76, 1.74) | 1.12 (0.74, 1.69) | 0.99 (0.63, 1.55) | 0.81 (0.5, 1.30)  | 0.27 | 0.94 (0.81, 1.09) |
| Model 1 + BMI§                                                      | 1.00 (ref.) | 1.17 (0.78, 1.75) | 1.09 (0.73, 1.63) | 1.07 (0.69, 1.67) | 0.97 (0.6, 1.55)  | 0.76 | 0.99 (0.85, 1.15) |
| Excluding participants with excessive alcohol consumption**         |             |                   |                   |                   |                   |      |                   |
| N Cases (score≥-0.640)                                              | 38          | 43                | 50                | 37                | 32                |      |                   |
| Model 1                                                             | 1.00 (ref.) | 1.10 (0.73, 1.68) | 1.28 (0.85, 1.91) | 1.00 (0.64, 1.56) | 0.80 (0.5, 1.29)  | 0.32 | 0.96 (0.83, 1.11) |
| Model 1 + BMI§                                                      | 1.00 (ref.) | 1.15 (0.76, 1.74) | 1.18 (0.80, 1.73) | 1.06 (0.69, 1.65) | 0.96 (0.6, 1.54)  | 0.75 | 1.00 (0.86, 1.17) |
| Excluding participants with implausible energy intake††             |             |                   |                   |                   |                   |      |                   |
| N Cases (score≥-0.640)                                              | 39          | 46                | 48                | 38                | 30                |      |                   |
| Model 1                                                             | 1.00 (ref.) | 1.32 (0.75, 2.35) | 1.48 (0.84, 2.60) | 1.06 (0.59, 1.91) | 1.15 (0.64, 2.07) | 0.92 | 0.95 (0.82, 1.10) |
| Model 1 + BMI§                                                      | 1.00 (ref.) | 1.34 (0.76, 2.38) | 1.35 (0.77, 2.37) | 1.06 (0.59, 1.89) | 1.29 (0.72, 2.33) | 0.67 | 0.99 (0.85, 1.16) |
| Excluding participants with secondary causes of hepatic steatosis‡‡ |             |                   |                   |                   |                   |      |                   |
| N Cases (score≥-0.640)                                              | 41          | 46                | 50                | 37                | 31                |      |                   |
| Model 1                                                             | 1.00 (ref.) | 1.19 (0.79, 1.81) | 1.26 (0.84, 1.89) | 1.06 (0.68, 1.65) | 0.78 (0.48, 1.27) | 0.25 | 0.95 (0.82, 1.10) |
| Model 1 + BMI§                                                      | 1.00 (ref.) | 1.23 (0.82, 1.85) | 1.17 (0.79, 1.73) | 1.11 (0.71, 1.72) | 0.93 (0.57, 1.52) | 0.66 | 0.99 (0.85, 1.16) |
| Excluding participants with diabetes§§                              |             |                   |                   |                   |                   |      |                   |
| N Cases (score≥-0.640)                                              | 37          | 43                | 50                | 36                | 30                |      |                   |
| Model 1                                                             | 1.00 (ref.) | 1.17 (0.76, 1.79) | 1.37 (0.90, 2.06) | 1.05 (0.67, 1.66) | 0.85 (0.52, 1.39) | 0.43 | 0.97 (0.83, 1.12) |
| Model 1 + BMI§                                                      | 1.00 (ref.) | 1.21 (0.79, 1.85) | 1.26 (0.85, 1.87) | 1.11 (0.71, 1.75) | 1.01 (0.62, 1.63) | 0.89 | 1.01 (0.86, 1.18) |

Abbreviations: SES, socio economic status; BMI, body mass index; MD, Mediterranean Diet; NAFLD, non-alcoholic fatty liver disease; SD, standard deviation; CI, confidence interval.

Statistical analysis using Poisson regression with robust standard errors; results are expressed as risk ratios and (95% confidence intervals).

\* In categorical analysis, the population was divided into five groups by quintiles (Q1-Q5) of the Mediterranean diet score; Standard deviation was 1.41 after excluding alcohol from Mediterranean Diet score components, 1.20 after excluding participants with BMI≥30, 1.18 after excluding participants with excessive alcohol consumption, 1.20 after excluding participants with probable implausible energy intake or after excluding participants with secondary causes of hepatic steatosis or diabetes.

† Calculated based on an algorithm including BMI, waist circumference, triglycerides, and gamma-glutamyl transferase.

‡ Adjusted for age (years), sex, marital status (single, married/cohabitant, and widowed/Separated/divorced), occupational status (working and not working), education level (university, high school, apprenticeship, and mandatory education), smoking status (never, former, and current), energy intake (kcal/day), total energy expenditure (kcal/day), and date of dietary assessment.

§ Results of further adjustment for waist circumference were broadly in line with of the further adjustment for BMI (data not shown).

|| Excluded 36 participants with BMI≥30 kg/m<sup>2</sup>.

\*\* Excessive alcohol consumption defined as >21 units per week for men and >14 units per weeks for women; excluded 60 participants with excess alcohol consumption (n=2228).

†† Implausible energy intake defined as <500 and <800 kcal or >3,500 or >4,000 kcal in women and men, respectively; excluded 41 participants with probable implausible energy intake (n=2247).

‡‡ Secondary causes of hepatic steatosis defined as having hepatitis B, C or HIV, and with hepatotoxic medications (Glucocorticoids, isoniazid, methotrexate, amiodarone, and tamoxifen); excluded 36 participants with probable secondary causes of hepatic steatosis (n=2252).

§§ Diabetes defined as glycated haemoglobin  $\geq 48$  mmol/mol, or fasting plasma glucose  $\geq 7.0$  mmol/L, or use of hypoglycaemic drugs or insulin; excluded 26 participants with probable secondary causes of hepatic steatosis (n=2262).

¶¶ Calculated based on an algorithm including presence of the metabolic syndrome and type 2 diabetes, and concentrations of fasting serum insulin, fasting serum aspartate-aminotransferase (AST), and the AST/alanine-aminotransferase ratio.

**Table S5** Prospective association of the Mediterranean diet score with the risk of hepatic steatosis, CoLaus study, Switzerland: sensitivity analysis while excluding participants with only one of the indices high at baseline and using hepatic steatosis index as an alternative score.

|                                                           | Risk ratio (95% CI) across quintiles of Mediterranean diet score* |                   |                   |                   |                   | P-trend | Risk ratio<br>(95% CI)<br>Per SD increase * |
|-----------------------------------------------------------|-------------------------------------------------------------------|-------------------|-------------------|-------------------|-------------------|---------|---------------------------------------------|
|                                                           | Q1                                                                | Q2                | Q3                | Q4                | Q5                |         |                                             |
| <i>range</i>                                              | 1.83-7.64                                                         | 7.64-8.34         | 8.35-8.92         | 8.93-9.57         | 9.58-12.18        |         |                                             |
| N total (n=2652)                                          | 531                                                               | 530               | 531               | 530               | 530               |         |                                             |
| Fatty liver index, <i>median</i> (iqr) <sup>†</sup>       | 23.4 (11.1, 41.4)                                                 | 24.1 (10.6, 44.7) | 22.3 (9.9, 39.7)  | 20.2 (8.4, 38.4)  | 17.5 (7.3, 34.5)  |         |                                             |
| N cases (score≥60)                                        | 51                                                                | 56                | 54                | 35                | 24                |         |                                             |
| Unadjusted                                                | 1.00 (ref.)                                                       | 1.10 (0.77, 1.58) | 1.06 (0.74, 1.52) | 0.69 (0.45, 1.04) | 0.47 (0.29, 0.75) | <0.001  | 0.79 (0.69, 0.89)                           |
| Multivariable ‡                                           | 1.00 (ref.)                                                       | 1.12 (0.77, 1.63) | 1.25 (0.86, 1.81) | 0.88 (0.57, 1.35) | 0.56 (0.34, 0.92) | 0.011   | 0.86 (0.74, 0.99)                           |
| Multivariable + BMI                                       | 1.00 (ref.)                                                       | 1.08 (0.75, 1.54) | 0.99 (0.70, 1.41) | 0.85 (0.56, 1.30) | 0.59 (0.36, 0.96) | 0.017   | 0.84 (0.73, 0.98)                           |
| Multivariable + BMI & WC                                  | 1.00 (ref.)                                                       | 1.01 (0.71, 1.45) | 0.99 (0.70, 1.40) | 0.84 (0.56, 1.28) | 0.58 (0.35, 0.95) | 0.019   | 0.84 (0.72, 0.98)                           |
| <i>range</i>                                              | 1.83-7.56                                                         | 7.57-8.29         | 8.30-8.88         | 8.89-9.53         | 9.54-12.12        |         |                                             |
| N total (n=2568)                                          | 514                                                               | 514               | 513               | 514               | 513               |         |                                             |
| NAFLD-score, <i>median</i> (iqr) <sup>§</sup>             | -1.9 (-2.4, -1.3)                                                 | -1.8 (-2.3, -1.2) | -1.9 (-2.4, -1.3) | -2.0 (-2.5, -1.3) | -2.1 (-2.5, -1.6) |         |                                             |
| N cases (score≥-0.640)                                    | 63                                                                | 70                | 67                | 59                | 38                |         |                                             |
| Unadjusted                                                | 1.00 (ref.)                                                       | 1.11 (0.81, 1.53) | 1.07 (0.77, 1.47) | 0.94 (0.67, 1.31) | 0.60 (0.41, 0.89) | 0.006   | 0.88 (0.79, 0.99)                           |
| Multivariable ‡                                           | 1.00 (ref.)                                                       | 1.16 (0.83, 1.62) | 1.16 (0.83, 1.61) | 1.02 (0.72, 1.46) | 0.66 (0.44, 1.00) | 0.039   | 0.92 (0.81, 1.04)                           |
| Multivariable + BMI                                       | 1.00 (ref.)                                                       | 1.27 (0.91, 1.76) | 1.24 (0.89, 1.72) | 1.16 (0.81, 1.65) | 0.84 (0.55, 1.28) | 0.34    | 0.98 (0.87, 1.11)                           |
| Multivariable + BMI & WC                                  | 1.00 (ref.)                                                       | 1.25 (0.90, 1.73) | 1.24 (0.89, 1.72) | 1.16 (0.82, 1.65) | 0.83 (0.54, 1.27) | 0.34    | 0.99 (0.87, 1.12)                           |
| <i>range</i>                                              | 1.83-7.15                                                         | 7.16-8.07         | 8.08-8.76         | 8.77-9.47         | 9.48-12.18        |         |                                             |
| N total (n=2351)                                          | 471                                                               | 470               | 470               | 470               | 470               |         |                                             |
| Hepatic steatosis index, <i>median</i> (iqr) <sup>†</sup> | 32.4 (30.5, 34.4)                                                 | 32.3 (30.3, 34.6) | 32.5 (30.4, 34.5) | 32.6 (30.6, 34.4) | 32.4 (30.3, 34.1) |         |                                             |
| N cases (score>36)                                        | 166                                                               | 123               | 120               | 120               | 103               |         |                                             |
| Unadjusted                                                | 1.00 (ref.)                                                       | 0.74 (0.61, 0.90) | 0.72 (0.59, 0.88) | 0.72 (0.59, 0.88) | 0.62 (0.50, 0.76) | <0.001  | 0.85 (0.79, 0.90)                           |
| Multivariable ‡                                           | 1.00 (ref.)                                                       | 0.77 (0.61, 0.96) | 0.79 (0.63, 1.00) | 0.83 (0.65, 1.04) | 0.70 (0.55, 0.91) | 0.070   | 0.90 (0.82, 0.98)                           |

Abbreviations: iqr, interquartile range; SES, socio-economic status; BMI, body mass index; WC, waist circumference; NAFLD, non-alcoholic fatty liver disease.

Statistical analysis using Poisson regression with robust standard errors; results are expressed as risk ratios and (95% confidence intervals).

\* In categorical analysis, the population was divided into five groups by quintiles (Q1-Q5) of the Mediterranean diet score; Standard deviation was 1.21 for the multivariable analyses.

<sup>†</sup> Calculated based on an algorithm including BMI, waist circumference, triglycerides, and gamma-glutamyl transferase.

<sup>‡</sup> Adjusted for age (years), sex, marital status (single, married/cohabiting, and widowed/Separated/divorced), occupational status (working and not working), education level (university, high school, apprenticeship, and mandatory education), smoking status (never, former, and current), energy intake (kcal/day), total energy expenditure (kcal/day), and date of dietary assessment.

§ Calculated based on an algorithm including presence of the metabolic syndrome and type 2 diabetes, and concentrations of fasting serum insulin, fasting serum aspartate-aminotransferase (AST), and the AST/alanine-aminotransferase ratio.

**Table S6** Prospective association of the Mediterranean diet score with the risk of hepatic steatosis, CoLaus study, Switzerland (n=1632), Sensitivity analysis while excluding participants with either indices high (using FLI>30 instead of FLI≥60).

|                                  | Risk ratio (95% CI) across quintiles of Mediterranean diet score* |                   |                   |                   |                   | P-trend | Risk ratio<br>(95% CI)<br>Per SD increase* |
|----------------------------------|-------------------------------------------------------------------|-------------------|-------------------|-------------------|-------------------|---------|--------------------------------------------|
|                                  | Q1                                                                | Q2                | Q3                | Q4                | Q5                |         |                                            |
| <i>range</i>                     | 1.83-7.63                                                         | 7.64-8.35         | 8.36-8.92         | 8.93-9.59         | 9.60-12.1         |         |                                            |
| N total                          | 327                                                               | 326               | 327               | 326               | 326               |         |                                            |
| Fatty liver index, median (iqr)† | 14.9 (7.6, 24.8)                                                  | 12.7 (7.4, 23.7)  | 12.3 (5.5, 22.3)  | 11.8 (6.3, 22.7)  | 10.2 (5.5, 21.8)  |         |                                            |
| N cases (score≥60)               | 9                                                                 | 5                 | 2                 | 2                 | 3                 |         |                                            |
| Unadjusted                       | 1.00 (ref.)                                                       | 0.56 (0.19, 1.65) | 0.22 (0.05, 1.02) | 0.22 (0.05, 1.02) | 0.33 (0.09, 1.22) | 0.047   | 0.66 (0.45, 0.97)                          |
| Multivariable ‡                  | 1.00 (ref.)                                                       | 0.63 (0.20, 2.00) | 0.14 (0.02, 0.96) | 0.27 (0.05, 1.32) | 0.39 (0.09, 1.68) | 0.096   | 0.72 (0.47, 1.10)                          |
| Multivariable + BMI              | 1.00 (ref.)                                                       | 0.68 (0.22, 2.05) | 0.13 (0.02, 0.98) | 0.26 (0.06, 1.15) | 0.41 (0.10, 1.70) | 0.087   | 0.73 (0.48, 1.11)                          |
| Multivariable + BMI + WC         | 1.00 (ref.)                                                       | 0.50 (0.18, 1.42) | 0.12 (0.01, 0.98) | 0.22 (0.05, 1.03) | 0.39 (0.09, 1.67) | 0.093   | 0.71 (0.46, 1.09)                          |
| NAFLD-score, median (iqr)§       | -2.2 (-2.5, -1.8)                                                 | -2.2 (-2.5, -1.7) | -2.2 (-2.5, -1.8) | -2.2 (-2.6, -1.8) | -2.2 (-2.6, -1.8) |         |                                            |
| N cases (score≥-0.640)           | 13                                                                | 14                | 10                | 13                | 12                |         |                                            |
| Unadjusted                       | 1.00 (ref.)                                                       | 1.08 (0.52, 2.26) | 0.77 (0.34, 1.73) | 1.00 (0.47, 2.13) | 0.93 (0.43, 2.00) | 0.79    | 0.94 (0.73, 1.20)                          |
| Multivariable ‡                  | 1.00 (ref.)                                                       | 1.13 (0.55, 2.32) | 0.79 (0.35, 1.76) | 1.10 (0.52, 2.34) | 0.98 (0.45, 2.15) | 0.94    | 0.95 (0.73, 1.24)                          |
| Multivariable + BMI              | 1.00 (ref.)                                                       | 1.25 (0.60, 2.60) | 0.81 (0.36, 1.84) | 1.20 (0.56, 2.58) | 1.13 (0.51, 2.52) | 0.82    | 0.98 (0.75, 1.28)                          |
| Multivariable + BMI + WC         | 1.00 (ref.)                                                       | 1.17 (0.57, 2.44) | 0.85 (0.37, 1.93) | 1.13 (0.52, 2.45) | 1.12 (0.50, 2.53) | 0.84    | 0.98 (0.75, 1.28)                          |

Abbreviations: iqr, interquartile range; BMI, body mass index; WC, waist circumference; NAFLD, non-alcoholic fatty liver disease.

Statistical analysis using Poisson regression with robust standard errors; results are expressed as risk ratios and (95% confidence intervals).

\* In categorical analysis, the population was divided into five groups by quintiles (Q1-Q5) of the Mediterranean diet score; Standard deviation was 1.21 for the multivariable analyses.

† Calculated based on an algorithm including BMI, waist circumference, triglycerides, and gamma-glutamyl transferase.

‡ Adjusted for age (years), sex, marital status (single, married/cohabiting, and widowed/Separated/divorced), occupational status (working and not working), education level (university, high school, apprenticeship, and mandatory education), smoking status (never, former, and current), energy intake (kcal/day), total energy expenditure (kcal/day), and date of dietary assessment.

§ Calculated based on an algorithm including presence of the metabolic syndrome and type 2 diabetes, and concentrations of fasting serum insulin, fasting serum aspartate-aminotransferase (AST), and the AST/alanine-aminotransferase ratio.

**Table S7** Association of the Mediterranean diet score with change in BMI and waist circumference, CoLaus study, Switzerland.

|                                | β coefficient (95% CI ) across quintiles of Mediterranean diet score* |                     |                     |                     |                     | P-trend | β coefficient<br>(95% CI)<br>Per SD increase* |
|--------------------------------|-----------------------------------------------------------------------|---------------------|---------------------|---------------------|---------------------|---------|-----------------------------------------------|
|                                | Q1                                                                    | Q2                  | Q3                  | Q4                  | Q5                  |         |                                               |
| range                          | 1.83-7.63                                                             | 7.64-8.35           | 8.36-8.92           | 8.93-9.59           | 9.60-12.1           |         |                                               |
| N total                        | 458                                                                   | 458                 | 457                 | 458                 | 457                 |         |                                               |
| ΔBMI, mean±SD†                 | 0.48 ± 1.62                                                           | 0.61 ± 1.53         | 0.42 ± 1.44         | 0.50 ± 1.52         | 0.40 ± 1.52         |         |                                               |
| Multivariable ‡                | 1.00 (ref.)                                                           | 0.12 (-0.08, 0.33)  | -0.08 (-0.28, 0.13) | -0.04 (-0.25, 0.16) | -0.16 (-0.37, 0.04) | 0.038   | -0.08 (-0.15, -0.02)                          |
| ΔWaist circumference, mean±SD§ | 1.04 ± 6.53                                                           | 0.74 ± 6.42         | 0.19 ± 6.00         | 0.57 ± 6.33         | 0.17 ± 6.19         |         |                                               |
| Multivariable ‡                | 1.00 (ref.)                                                           | -0.51 (-1.36, 0.34) | -0.85 (-1.69, 0.00) | -0.47 (-1.32, 0.38) | -0.82 (-1.68, 0.03) | 0.10    | -0.33 (-0.61, -0.06)                          |

Abbreviations: BMI, Body mass index.  
Statistical analysis using linear regression; results are expressed as β coefficients and (95% confidence intervals).  
\* In categorical analysis, the population was divided into five groups by quintiles (Q1-Q5) of the Mediterranean diet score; Standard deviation was 1.20 for the multivariable analyses.  
† Calculated by subtracting BMI at baseline from BMI at follow-up.  
‡ Adjusted for age (years), sex, marital status (single, married/cohabitant, and widowed/Separated/divorced), occupational status (working and not working), education level (university, high school, apprenticeship, and mandatory education), smoking status (never, former, and current), energy intake (kcal/day), total energy expenditure (kcal/day), and date of dietary assessment.  
§ Calculated by subtracting waist circumference at baseline from waist circumference at follow-up.

**Table S8** Association of the Mediterranean diet score with the GGT, ALT, and AST, CoLaus study, Switzerland.

|                                | $\beta$ coefficient (95% CI) across quintiles of Mediterranean diet score* |                     |                      |                      |                       | <i>P</i> -trend | $\beta$ coefficient (95% CI)<br>Per SD increase * |
|--------------------------------|----------------------------------------------------------------------------|---------------------|----------------------|----------------------|-----------------------|-----------------|---------------------------------------------------|
|                                | Q1                                                                         | Q2                  | Q3                   | Q4                   | Q5                    |                 |                                                   |
| <i>range</i>                   | 1.83-7.63                                                                  | 7.64-8.35           | 8.36-8.92            | 8.93-9.59            | 9.60-12.12            |                 |                                                   |
| N total                        | 458                                                                        | 458                 | 457                  | 458                  | 457                   |                 |                                                   |
| GGT (U/l), <i>median</i> (iqr) | 21 (15, 29)                                                                | 20 (14, 29)         | 19 (14, 26)          | 18 (14, 28)          | 17 (13, 26)           |                 |                                                   |
| Multivariable †                | 1.00 (ref.)                                                                | -2.63 (-9.01, 3.76) | -5.71 (-12.07, 0.66) | -4.24 (-10.64, 2.16) | -6.03 (-12.45, 0.38)  | 0.063           | -1.53 (-3.60, 0.53)                               |
| Multivariable + BMI            | 1.00 (ref.)                                                                | -2.86 (-9.24, 3.53) | -5.70 (-12.06, 0.66) | -4.50 (-10.90, 1.90) | -6.52 (-12.95, -0.09) | 0.047           | -1.66 (-3.73, 0.41)                               |
| Multivariable + BMI & WC       | 1.00 (ref.)                                                                | -2.93 (-9.32, 3.45) | -5.72 (-12.08, 0.64) | -4.54 (-10.94, 1.86) | -6.53 (-12.96, -0.10) | 0.047           | -1.65 (-3.72, 0.41)                               |
| ALT (U/l), <i>median</i> (iqr) | 20 (16, 26)                                                                | 20.5 (17, 26)       | 20 (16, 26)          | 19.5 (16, 25)        | 20 (16, 25)           |                 |                                                   |
| Multivariable †                | 1.00 (ref.)                                                                | 0.03 (-0.02, 0.08)  | 0.03 (-0.02, 0.08)   | -0.013 (-0.06, 0.04) | 0.002 (-0.05, 0.05)   | 0.45            | -0.006 (-0.02, 0.01)                              |
| Multivariable + BMI            | 1.00 (ref.)                                                                | 0.04 (-0.01, 0.08)  | 0.03 (-0.02, 0.08)   | -0.009 (-0.06, 0.04) | 0.008 (-0.04, 0.06)   | 0.60            | -0.005 (-0.02, 0.01)                              |
| Multivariable + BMI & WC       | 1.00 (ref.)                                                                | 0.04 (-0.01, 0.08)  | 0.03 (-0.02, 0.08)   | -0.01 (-0.06, 0.04)  | 0.008 (-0.04, 0.06)   | 0.60            | -0.005 (-0.02, 0.01)                              |
| AST (U/l), <i>median</i> (iqr) | 22 (19, 25)                                                                | 22 (19, 26)         | 22 (19, 25)          | 22 (19, 26)          | 22 (19, 25)           |                 |                                                   |
| Multivariable †                | 1.00 (ref.)                                                                | 0.02 (-0.01, 0.06)  | 0.004 (-0.03, 0.04)  | 0.011 (-0.03, 0.05)  | 0.015 (-0.02, 0.05)   | 0.66            | 0.003 (-0.01, 0.01)                               |
| Multivariable + BMI            | 1.00 (ref.)                                                                | 0.02 (-0.02, 0.06)  | 0.004 (-0.03, 0.04)  | 0.009 (-0.03, 0.04)  | 0.011 (-0.03, 0.05)   | 0.80            | 0.002 (-0.01, 0.01)                               |
| Multivariable + BMI & WC       | 1.00 (ref.)                                                                | 0.02 (-0.02, 0.06)  | 0.004 (-0.03, 0.04)  | 0.009 (-0.03, 0.04)  | 0.011 (-0.03, 0.05)   | 0.80            | 0.002 (-0.01, 0.01)                               |

Abbreviations: iqr, interquartile range; GGT, gamma-glutamyl transferase; SES, socio economic status; BMI, body mass index; WC, waist circumference; ALT, Alanine transaminase; AST, aspartate-aminotransferase.

Statistical analysis using linear regression; results are expressed as  $\beta$  coefficients and (95% confidence intervals).

\* In categorical analysis, the population was divided into five groups by quintiles (Q1-Q5) of the Mediterranean diet score; Standard deviation was 1.20 for the multivariable analyses.

† Adjusted for age (years), sex, marital status (single, married/cohabitant, and widowed/Separated/divorced), occupational status (working and not working), education level (university, high school, apprenticeship, and mandatory education), smoking status (never, former, and current), energy intake (kcal/day), total energy expenditure (kcal/day), and date of dietary assessment.
